1 **Demographic impacts of low- and high-intensity fire in a riparian savanna**  
2 **bird: implications for ecological fire management**

3

4 Niki Teunissen<sup>a,b</sup>, Hamish McAlpine<sup>c</sup>, Skye F. Cameron<sup>c</sup>, Brett P. Murphy<sup>d</sup>, and Anne Peters<sup>b</sup>

5

6 <sup>a</sup>Behavioural Ecology Group, Department of Animal Sciences, Wageningen University & Research,  
7 Wageningen, The Netherlands

8 <sup>b</sup>School of Biological Sciences, Monash University, Clayton, Australia

9 <sup>c</sup>Australian Wildlife Conservancy, the Kimberley, Australia

10 <sup>d</sup>Research Institute for the Environment and Livelihoods, Charles Darwin University, Darwin,  
11 Australia

12

13 **ABSTRACT**

14 1. Climate change is driving changes in fire frequency and intensity, making it more urgent for  
15 conservation managers to understand how species and ecosystems respond to fire. In tropical  
16 monsoonal savannas – Earth’s most fire-prone landscapes – ecological fire management aims to  
17 prevent intense wildfires late in the dry season through prescribed low-intensity fire early in the  
18 dry season. Riparian habitats embedded within tropical savannas represent critical refuges for  
19 biodiversity, yet are particularly sensitive to fire. Better understanding of the impact of fire –  
20 including prescribed burns – on riparian habitats is therefore key, but requires long-term  
21 detailed post-fire monitoring of species’ demographic rates, as effects may persist and/or be  
22 delayed.

23 2. Here, we quantify the multi-year impacts of prescribed low-intensity and high-intensity fire on  
24 the density, survival, reproduction and dispersal of the threatened western purple-crowned  
25 fairy-wren (*Malurus coronatus coronatus*), in an exceptionally well-studied individually-marked  
26 population.

27 3. Following low-intensity fire, bird density was reduced in the burnt compared to adjacent  
28 unburnt riparian habitat for at least 2.5 years. This was a result of reduced breeding success and  
29 recruitment for two years immediately following the fire, rather than mortality of adults or  
30 dispersal away from burnt habitat.

31 4. In contrast, a high-intensity fire (in a year with low rainfall) resulted in a sharp decline in  
32 population density 2-8 months after the fire, with no signs of recovery after 2.5 years. The  
33 decline in density was due to post-fire adult mortality, rather than dispersal. Breeding success

34 of the (few) remaining individuals was low but not detectably lower than in unburnt areas, likely  
35 because breeding success was poor overall due to prevailing dry conditions.

36 5. Hence, even if there is no or very low mortality during fire, and no movement of birds away  
37 from burnt areas post-fire, both low- and high-intensity fire in the riparian zone result in  
38 reduced population density. However, the mechanism by which this occurs, and recovery time,  
39 differs with fire intensity. To minimise the impacts of fire on riparian zones in tropical savannas,  
40 we suggest employing low-intensity prescribed burns shortly after the breeding season in years  
41 with good rainfall.

42

43 Keywords: wildfire, land management, conservation, post-fire recovery, fire intensity, riparian zone

44

## 45 INTRODUCTION

46 Fire is an important disturbance and selective pressure, shaping ecosystems worldwide (Nimmo et  
47 al. 2021, Gonzalez et al. 2022). However, the frequency, intensity, and size of fires is increasing  
48 around the globe, due to anthropogenic land use and climate change causing increasingly warm and  
49 dry conditions (Bowman et al. 2009, Wu et al. 2021). A single fire can dramatically alter key  
50 resources and the abundance and diversity of species for decades to follow (Gonzalez et al. 2022). As  
51 a result, changing fire regimes are transforming terrestrial ecosystems and posing a threat to  
52 biodiversity (Kelly et al. 2020, Gonzalez et al. 2022). This is occurring through increased stochastic  
53 and sporadic extreme events such as mega-fires (Nimmo et al. 2021), but also in the landscapes  
54 traditionally shaped by annual fire seasons, such as monsoonal savannas. These are characterised by  
55 a wet season, associated with a build-up of fuel, which cures over the following dry season,  
56 promoting high fire frequencies (Andersen 2021). To reduce the risk of frequent and large, high-  
57 intensity wildfires, ecological fire management is used extensively in such areas (Russell-Smith et al.  
58 2013, Andersen 2021). This typically involves prescribed burning early in the dry season, when fire  
59 weather conditions are relatively mild and fires tend to be small, patchy, and of low intensity.  
60 Creating a mosaic of patches varying in fire history promotes plant and animal diversity and reduces  
61 the extent and frequency of large, high-intensity wildfires late in the dry season (Parr and Andersen  
62 2006, Russell-Smith et al. 2013, Andersen 2021). However, this approach to fire management  
63 currently does not sufficiently consider the effect of fire on animal movement within or among  
64 habitat patches, or the implications for long-term population persistence (Sitters and Di Stefano  
65 2020).

66 Riparian ecosystems embedded within fire-prone tropical savanna landscapes are among the  
67 most vulnerable in the face of climate change (Tockner and Stanford 2002, Capon et al. 2013). Yet

68 they are also vitally important: they harbour high biodiversity, act as movement corridors, and  
69 provide key refugia from climate warming and drought (Woinarski et al. 2000, Capon et al. 2013,  
70 Fremier et al. 2015, Krosby et al. 2018). Although riparian zones can also provide a refuge from and  
71 buffer against fire, under certain conditions, riparian zones become corridors through which fire can  
72 spread (Pettit and Naiman 2007). Ecological consequences of fire in riparian zones are more severe  
73 compared to surrounding savanna (Pettit and Naiman 2007, Douglas et al. 2015, Flores et al. 2021).  
74 It is therefore of vital importance to quantify effects of fire on riparian zones, and their recovery, to  
75 inform management of these key refugia (Pettit and Naiman 2007, Douglas et al. 2015).

76         Particularly, we need to enhance our understanding of the underlying processes through which  
77 animal populations are affected by fire. Direct mortality rates during fire seem to be generally low  
78 (~3%) (Nimmo et al. 2021, Jolly et al. 2022). However, fire also affects populations indirectly, through  
79 habitat change, reducing availability of food and shelter and increasing predation (McGregor et al.  
80 2015, Andersen 2021, Jolly et al. 2022). This may affect survival and/or breeding success (Murphy et  
81 al. 2010), resulting in population decline. Animals may also modify their behaviour in response to  
82 fire, for example moving to unburnt habitat during or immediately after the fire (Murphy et al. 2010,  
83 Pausas and Parr 2018, Nimmo et al. 2019, Nimmo et al. 2021). Hence, apparent population declines  
84 may also result from such behavioural adaptations. To identify the mechanisms of fire impacts on  
85 populations, it is therefore critical to quantify mortality, movements and breeding success of  
86 individuals pre- and post-fire compared to unburnt controls (Driscoll et al. 2010, Nimmo et al. 2019).

87         Here, we investigate the demographic impacts of low- and high-intensity fire in riparian habitat  
88 in the tropical savanna of northern Australia, an important refuge for many species, including birds  
89 (Woinarski et al. 2000). Our study species is the western purple-crowned fairy-wren (*Malurus*  
90 *coronatus coronatus*), widely considered a biological indicator of riparian health in the region  
91 (Skroblin and Legge 2012). It is a riparian endemic listed as Endangered under Australian national  
92 legislation due to extensive habitat degradation by feral herbivores and intense fires (Skroblin and  
93 Legge 2012). Our study population has been studied since 2005, with detailed records of mortality,  
94 movement and reproduction for all individuals. Utilising a before-after control-impact (BACI) design,  
95 we quantify fairy-wren density for 2.5 years before and 2.5 years after a low- and a high-intensity  
96 fire, in both burnt and adjacent unburnt riparian habitat. Specifically, we investigate: whether fire  
97 caused mortality via direct or indirect effects; the role of movement by birds out of burnt habitat;  
98 and the importance of reduced breeding success. Finally, we consider how our findings can inform  
99 fire management strategies.

100

101 **METHODS**

102 *Study system*

103 Research took place at Annie Creek in Australian Wildlife Conservancy's Mornington Wildlife  
104 Sanctuary (17°31'S 126°6'E) in the Kimberley region of north-western Australia. Here, we have  
105 studied a population of the western purple-crowned fairy-wren since 2005. Throughout its range,  
106 this fairy-wren is absent from degraded riparian vegetation (Skroblin and Legge 2012). This is largely  
107 because of its strong positive association with the riparian tree *Pandanus aquaticus* (henceforth  
108 referred to simply as *Pandanus*) which declines in abundance as sites become degraded (Skroblin  
109 and Legge 2012).

110 Purple-crowned fairy-wrens live in groups (a dominant breeding pair plus a variable number of  
111 subordinates; Kingma et al. 2010) that occupy territories aligned linearly along waterways and  
112 defended year-round (Kingma et al. 2010). Birds can disperse to settle as a breeder or subordinate  
113 elsewhere (Hidalgo Aranzamendi et al. 2016). Breeding mostly takes place during the wet season  
114 (December-April) (Kingma et al. 2010). Purple-crowned fairy-wrens usually lay 3 eggs (range 1-5),  
115 incubation lasts for 14 days, and the nestling period for 13 days (Teunissen et al. 2020). Nest failure  
116 is common (78% of nests), mostly due to predation (57% of nests) (Teunissen et al. 2020). Individuals  
117 can re-nest multiple times in a season.

118

119 *Fire history*

120 Northern Australia is characterised by a monsoonal wet season (ca. December – April), followed by a  
121 dry season (ca. May – November), with high fire frequencies late dry season (Andersen 2021). At our  
122 study site, fire regimes have been managed by AWC since 2004 for biodiversity conservation using  
123 prescribed burning early in the dry season (prior to July) to limit large-scale high-intensity wildfires  
124 late in the dry season. This approach to fire management is common throughout northern Australia  
125 and follows on from traditional fire management imposed on the landscape by Aboriginal people for  
126 millennia (Russell-Smith et al. 2013, Andersen 2021). As a result of prescribed burning at Mornington  
127 Wildlife Sanctuary, intense fires burning *Pandanus* in riparian zones are generally rare. However, two  
128 recent prescribed fires burnt sections of Annie Creek. Prior to these, fire had not burnt the riparian  
129 vegetation along Annie Creek for at least 11 years.

130 The first fire occurred in February 2015. The preceding 12-month period had rainfall slightly  
131 below average (748 mm vs. annual average of 868 mm for 2005-2022; Bureau of Meteorology  
132 weather station 2076). The fire was lit at Annie Creek, burnt a relatively small area, and fire weather  
133 conditions at the time of the fire were mild, with the wind pushing the fire away from Annie Creek.  
134 As a result, the fire was of low intensity, patchy – as is common for fires this time of year – and left  
135 small stands of *Pandanus* unburnt. The fire burnt 0.78 km of our study site's 4.2 km stretch of Annie

136 Creek, corresponding to eight burnt purple-crowned fairy-wren territories, while 35 territories  
137 remained unburnt (Fig 1a).

138 The second fire occurred in March 2019. The preceding 12-month period had extremely low  
139 rainfall (396 mm, the driest 12-month period since records began in 2005). Additionally, the fire was  
140 lit >5.5 km away from Annie Creek, but burnt a large area, and travelled to Annie Creek pushed by a  
141 strong wind, reaching Annie Creek as a large headfire. As a result of these conditions, despite the  
142 time of year, this fire acted more like a late dry season high-intensity fire. Most vegetation within the  
143 fire scar was burnt, and small patches of *Pandanus* initially left unburnt in the fire scar subsequently  
144 died (Fig. S1). The fire burnt 1.26 km of our study site's 4.2 km stretch of Annie Creek, including the  
145 stretch burnt in 2015, encompassing 13 fairy-wren territories, leaving 36 territories unburnt (Fig 1b).  
146 In addition, a short 60 m stretch of creek within a single fairy-wren territory was burnt further north  
147 on the creek (Fig. 1b), but at low intensity and on one bank only, making it not directly comparable  
148 to the other burnt territories, therefore this single territory was excluded from analyses.

149 For both fires, the adjacent sections of unburnt creekline (see Fig 1) provide a biologically  
150 relevant control, allowing us to assess the effect of fire while controlling for any confounding  
151 variables (e.g. variation in climate between years) which impact survival, movement, and breeding  
152 success.

153

#### 154 *Purple-crowned fairy-wren demography*

155 We monitored density, survival, dispersal, and breeding success of purple-crowned fairy-wrens from  
156 2011 to 2021. All birds along 15 km of Annie Creek and the adjoining Adcock River were uniquely  
157 colour-banded and followed throughout life. Each year, we conducted a full census of the population  
158 just before the wet season (mid-October to late November; hereafter termed season 'November'),  
159 and just after the wet season (late April to mid-June; hereafter season 'May'). Additionally, the  
160 population was monitored throughout the main breeding season from January to April in 2016-2021  
161 (except 2019). Each season, we recorded the presence, location and social status of all individuals.  
162 Density (individuals/km) was calculated as the total number of individuals inhabiting the burnt and  
163 unburnt sections of creek (Fig. 1) divided by their length (in km), at the end of each May and  
164 November season.

165 For all individuals present before each fire, we estimated duration of survival and timing of any  
166 dispersal. Each individual was considered alive until the last day of the last season in which it was  
167 seen in the study population (detection rate per season = 98%; Roast et al. 2020). Dispersal was  
168 determined from movements of individuals within the population and, in much rarer cases,  
169 emigration. To identify emigrants, we surveyed waterways connected to our study site for banded

170 individuals, using playback of conspecific song recordings (>90% detection probability; Hidalgo  
171 Aranzamendi et al. 2016). We surveyed all suitable habitat (i.e. containing *Pandanus*) within 20 km  
172 of the study area, and most suitable habitat in a wider 60 km radius (for full details, see Roast et al.  
173 2020). Hence, we can distinguish emigration from death, resulting in highly reliable estimates of  
174 survival.

175 We recorded breeding success over the course of an Austral year (i.e. 1 July – 30 June; to  
176 include the breeding peak, December-March). This was expressed as the total number of fledglings,  
177 free-flying juveniles recognisable from behaviour, morphological and plumage characteristics,  
178 detected in each territory.

179

#### 180 *Statistical analyses*

181 All statistical analyses were performed in R version 4.2.1 (R Core Development Team 2022), using  
182 the packages ‘lme4’ and ‘lmerTest’.

183 To test if low- or high-intensity fire affected population density, we used fairy-wren density  
184 (individuals/km) for five seasons immediately prior to, and five seasons following each fire. We  
185 compared density post- vs pre-fire in the burnt vs unburnt (control) section of creek by running for  
186 each fire a linear model with density as response variable, and as independent variables: time period  
187 (pre-fire, post-fire), fire treatment (burnt, unburnt), and their interaction.

188 To analyse whether low- or high-intensity fire affected adult survival, we ran a Cox proportional  
189 hazards model, using the ‘coxph’ function from the package ‘survival’. We analysed survival from  
190 immediately before the fire (the November field season prior to the fire) up to >2.5 years following  
191 fire (November 2017 for the 2015 fire, November 2021 for the 2019 fire). Individuals that were still  
192 alive by the end of this period were censored. All individuals present on our Annie Creek study site  
193 before the fire were included, except for one bird that was unbanded and could not be individually  
194 recognised to monitor survival (low-intensity fire: N = 31 in burnt area, N = 125 in unburnt area;  
195 high-intensity fire: N = 51 in burnt area, N = 123 in unburnt area). We ran a separate Cox model for  
196 each fire to test whether survival differed between fire treatments (burnt, unburnt), while  
197 controlling for the effect of social status (subordinate, dominant) on survival.

198 To analyse whether low- or high-intensity fire affected dispersal, we used the same  
199 approach, sample size, and time period as above for analysing survival. Birds still in their home  
200 territory by the end of the period were censored, as were birds that died during the period analysed  
201 (as they could not disperse past the moment of death). Again, we ran a Cox proportional hazards  
202 model for each fire to test whether the duration birds stayed home for differed between burnt and

203 unburnt regions. We also controlled for bird status, as subordinates are more likely to disperse  
204 (Hidalgo Aranzamendi et al. 2016).

205 Lastly, we analysed how low- or high-intensity fire affected breeding success (range = 0-5  
206 fledglings per territory per year). We compared breeding success over three Austral years before  
207 and after each fire. Both fires took place during the period when most breeding takes place. Since  
208 the fires likely disturbed that year's breeding attempts, we considered the wet seasons in which the  
209 fires occurred post-fire years. We were unable to include some territories for some years, due to  
210 territories splitting, merging, or ceasing to be inhabited. For the low-intensity fire, we had 18  
211 measures of breeding success for burnt territories pre-fire and 24 post-fire, and 88 unburnt  
212 territories pre-fire and 101 post-fire. For the high-intensity fire, our sample size included 32  
213 measures for burnt territories pre-fire and 24 post-fire, and 105 unburnt territories pre-fire and 91  
214 post-fire. We compared pre-fire and post-fire breeding success in the burnt and unburnt stretch of  
215 creek using generalised linear mixed models with poisson distribution. We included as response  
216 variable the number of fledglings produced on a territory in a given year, and as independent  
217 variables time period, fire treatment, and their interaction. We included territory ID as random  
218 effect to account for repeated measures for territories. Because we found a significant interaction  
219 between time period and fire treatment for the low-intensity fire, indicating reproductive success  
220 was lower in the burnt area post-fire (see Results), we sought to test how long this effect lasted for.  
221 Since no territories in the burnt area produced any fledglings in 2014/2015 (i.e. complete separation  
222 of the data; Fig. 4a), we ran a Bayesian GLMM using the 'rstanarm' and 'rstan' packages. We  
223 included the same variables as before except we replaced time period with year. We set priors to a  
224 normal distribution with mean = 0 and variance = 10, and variance = 100 for the intercept. We ran  
225 three chains of 15,000 iterations, with a thinning interval of 20 and warmup period of 5,000. We  
226 visually inspected trace, density, autocorrelation, and posterior predictive plots to confirm  
227 convergence of the model. We present posterior mean and 95% credible intervals (CI).

228

## 229 **RESULTS**

### 230 *Density*

231 After the low-intensity fire, fairy-wren density was reduced in the burnt area, but not in the unburnt  
232 control area compared to before the fire (interaction time period and fire treatment;  $B \pm SE = -12.04$   
233  $\pm 5.19$ ,  $t_{16} = -2.32$ ,  $P = 0.03$ ; Fig. 2a; Table S1). This difference reflects a slight decline in density in the  
234 burnt area at the time of the fire, and a concurrent increase in density in the unburnt area, while  
235 trajectories in both sections of creek appeared similar over the following two years (Fig. 2a).

236 For the high-intensity fire, fairy-wren density was lower post-fire compared to pre-fire in  
237 general, and in the burnt compared to the unburnt area (Table S1). However, fairy-wren density did  
238 not decrease more in the burnt area compared to the unburnt area (no interaction time period and  
239 fire treatment;  $B \pm SE = -0.22 \pm 6.10$ ,  $t_{16} = -0.04$ ,  $P = 0.97$ ; Fig. 2b; Table S1). Instead, fairy-wren  
240 density in the burnt area seemed to decrease in the six months following the fire (which this  
241 statistical model of density cannot formally test for, but which is addressed by the individual survival  
242 analyses, see below).

243

#### 244 *Survival*

245 Individual survival did not differ between the burnt and unburnt control area following a low-  
246 intensity fire ( $B \pm SE = -0.29 \pm 0.27$ ,  $z = -1.08$ ,  $P = 0.28$ ; Fig. 3a; Table S2). The high-intensity fire on  
247 the other hand significantly reduced survival in the burnt compared to the unburnt area ( $B \pm SE = -$   
248  $0.54 \pm 0.58$ ,  $z = -2.75$ ,  $P < 0.01$ ; Table S2). Survival seemed unaffected shortly following the high-  
249 intensity fire, but was clearly reduced in the longer term (2-14 months post-fire) (Fig. 3b).

250

#### 251 *Dispersal*

252 Individuals from the burnt area did not disperse more often than individuals in the unburnt area  
253 following the low-intensity fire ( $B \pm SE = -0.40 \pm 0.67$ ,  $z = -1.12$ ,  $P = 0.26$ ; Table S3), or the high-  
254 intensity fire ( $B \pm SE = 0.22 \pm 0.35$ ,  $z = 0.64$ ,  $P = 0.52$ ; Table S3).

255

#### 256 *Breeding success*

257 Just before the low-intensity fire, breeding success was comparable between the burnt and unburnt  
258 areas. However, following the fire, breeding success was lower in the burnt compared to the  
259 unburnt area (interaction time period and fire treatment;  $B \pm SE = -0.94 \pm 0.35$ ,  $z = -2.69$ ,  $P < 0.01$ ;  
260 Fig. 4a; Table S4). Breeding success was reduced for two years: in 2014/2015 (interaction year and  
261 fire treatment: posterior mean = 7.6, 95% CI = 2.2 – 16.7) and 2015/2016 (posterior mean = 2.6, 95%  
262 CI = 0.5 – 5.5). Before and after the high-intensity fire on the other hand, breeding success was  
263 comparable between burnt and unburnt territories (no interaction time period and fire treatment;  $B$   
264  $\pm SE = 0.10 \pm 0.37$ ,  $z = 0.29$ ,  $P = 0.77$ ; Fig. 4b; Table S4).

265

## 266 **DISCUSSION**

267 We used a before–after control–impact study design to examine population responses of a  
268 threatened riparian bird to low- and high-intensity fire. Close monitoring of individually marked birds  
269 with complete life-histories provided detailed information on demographic rates, allowing us to



270 identify the mechanisms driving changes in population density. We show that low-intensity fire  
271 reduced density in the first months immediately following fire, due to reduced recruitment. In  
272 contrast, high-intensity fire had its most pronounced negative effect on density 2-8 months after the  
273 fire, due to delayed mortality of adult birds. Since purple-crowned fairy-wrens are a biological  
274 indicator for riparian health, our findings can be used to fine-tune fire management practices in  
275 riparian habitats in tropical savannas.

276 Our findings support recent reviews showing that fire causes limited direct animal mortality,  
277 and instead impacts survival mostly through indirect effects caused by fire-induced changes to  
278 habitat and resource availability (Andersen 2021, Jolly et al. 2022). Our study is unusually robust  
279 because we can estimate true mortality with a high degree of accuracy, because we can distinguish  
280 death from emigration. Therefore, we can confidently conclude that the low-intensity fire did not  
281 result in mortality, immediate or delayed, whereas survival was reduced following high-intensity fire.  
282 This reduction in survival became evident >2 months after the high-intensity fire, which degraded  
283 habitat substantially (Fig. S1). These habitat changes may increase mortality by reducing resource  
284 availability (Valentine et al. 2012), or increasing hunting success of predators because prey are more  
285 exposed (McGregor et al. 2015, Hradsky et al. 2017). Additionally, we propose that fire-induced  
286 habitat changes likely expose birds to more extreme temperatures due to reduced cover. Riparian  
287 areas are characterised by a cool microclimate and provide refugia from climate warming (Krosby et  
288 al. 2018). Exposure to increased temperatures can affect animals' physiology and survival (Sharpe et  
289 al. 2019, Conradie et al. 2020), hence increased temperatures after fire may be an important  
290 mechanism through which fire indirectly causes mortality. Potential future research will focus on  
291 how fire affects microclimate at our study site, and consequences for fitness of fairy-wrens, to reveal  
292 additional mechanisms underlying post-fire population dynamics.

293 The capacity to move away from an active fire or to disperse to unburnt habitat following fire  
294 can be important adaptive strategies for avoiding fire impacts (Nimmo et al. 2019, Nimmo et al.  
295 2021). However, purple-crowned fairy-wrens did not disperse in response to fire, nor did breeding  
296 groups move their territory to nearby unburnt habitat. This possibly reflects that there was little  
297 suitable habitat available for fairy-wrens to disperse to, being restricted to a narrow band of suitable  
298 habitat along the creekline (Fig. 1). The fire response of the purple-crowned fairy-wren contrasts  
299 markedly with that of its sympatric congener, the red-backed fairy-wren, *Malurus melanocephalus*,  
300 which occurs in fire-prone savannas, rather than the riparian zone. Red-backed fairy-wrens  
301 dispersed and recentred their territories around unburnt habitat following low- and high-intensity  
302 fires (Murphy et al. 2010, Sommer et al. 2018). This response is thought to explain the apparent lack  
303 of post-fire mortality (but note that in these studies, individuals were only followed for 1-2 months

304 post-fire). The contrasting fire response of the purple-crowned fairy-wren is consistent with the  
305 general notion that riparian species are more strongly affected by fire than savanna species (Pettit  
306 and Naiman 2007, Douglas et al. 2015, Flores et al. 2021).

307 Breeding success of purple-crowned fairy-wrens was reduced immediately after the low-  
308 intensity fire, and – to a lesser extent – the following year (Fig. 4a). Reproductive output may have  
309 been impacted via several mechanisms. Firstly, since the fire occurred during the main breeding  
310 season, active nests would have burnt in the fire (indeed, we observed presumed burnt fairy-wren  
311 nests following the high-intensity fire). Secondly, habitat changes after fire likely reduced nest  
312 survival by enabling predators to detect nests more easily (e.g. Pittman and Krementz 2016), and/or  
313 because parents were more conspicuous when visiting the nest (Martin et al. 2000). Lastly, birds  
314 may have been less likely to re-nest, resulting in a shorter breeding season (as in red-backed fairy-  
315 wrens; Murphy et al. 2010). Surprisingly, breeding success was not significantly reduced by the high-  
316 intensity fire. This is probably because the fire coincided with, and was followed by, poor breeding  
317 conditions. Rainfall was unusually low the year the fire occurred (447 mm compared to annual  
318 average of 868 mm), and the following year (553 mm). Given that breeding is triggered by rainfall in  
319 this species (Aranzamendi et al. 2019), breeding success – including in unburnt habitat – was low for  
320 these years (near zero; Fig. 4b), and this probably limited our ability to detect any further depression  
321 of reproduction.

322 Assessing the direct and indirect effects of fire on riparian zones, and their recovery post-fire, is  
323 critical to refining fire management practices to protect these key ecosystems (Pettit and Naiman  
324 2007). Our results show that population recovery after riparian fire takes a long time. Following low-  
325 intensity fire, reproductive output of purple-crowned fairy-wrens was severely reduced for two  
326 breeding seasons. Following high-intensity fire, adult survival was severely reduced for at least a  
327 year. As a result, density remained substantially reduced for over two years at least following any  
328 fire event (Fig. 2). Since many species rely on riparian vegetation for foraging, dispersal, and to seek  
329 refuge from fire and hot temperatures (Woinarski et al. 2000, Capon et al. 2013, Fremier et al. 2015,  
330 Krosby et al. 2018), fire in riparian zones is expected to similarly affect a range of species. Recovery  
331 of populations after fire generally requires in situ survival as well as immigration from unburnt areas  
332 (Shaw et al. 2021, Hale et al. 2022). Intact riparian habitat is however severely fragmented across  
333 northern Australia, limiting connectivity between populations (Skroblin et al. 2014), and likely  
334 hindering post-fire recovery of many species that rely on riparian habitat, highlighting the  
335 importance of conservation and restoration of these habitats.

336

337 *Implications for conservation management*

338 In the savanna landscapes of northern Australia, historical increases in the frequency of high-  
339 intensity fires - primarily associated with the breakdown of Indigenous fire management practices  
340 following European colonisation - have driven the decline of a range of animals (Woinarski and Legge  
341 2013) and vegetation communities (Russell-Smith et al. 2002); however, the impacts of fire on  
342 northern Australian riparian habitats, and the biodiversity they host, have received too little  
343 attention. While riparian habitat can provide refuge from wildfires in the surrounding savanna  
344 matrix, it can also become a corridor for fire under certain conditions (Pettit and Naiman 2007).  
345 Moreover, extended droughts increase the risk of high-severity riparian fires, as do large flood  
346 events, which result in the accumulation of woody debris (i.e. fuel) in riparian zones (Pettit and  
347 Naiman 2005, 2007). Once a wildfire has occurred in the riparian zone, the subsequent build-up of  
348 dead wood also increases the risk of another fire (Pettit and Naiman 2007). Under continued climate  
349 change, rainfall is predicted to become more erratic across much of Australia, with more frequent  
350 periods of drought as well as more extreme rainfall events leading to large floods (Bureau of  
351 Meteorology and CSIRO 2020, Almazroui et al. 2021); hence, unless action is taken, we will see more  
352 frequent and severe fire in riparian zones.

353 Although future research should validate optimal fire frequency and strategy for riparian zones,  
354 we can use our current understanding of fire combined with the findings from this study to make  
355 recommendations to improve protection of riparian habitat from fire. With the increasing threat of  
356 fire to riparian zones, it appears that attempting to exclude fire from riparian habitat altogether  
357 constitutes a risky strategy, as the associated accumulation of fuel can lead to an increased risk of  
358 wildfires (Pettit and Naiman 2005, 2007). While reducing fuel loads in savannas adjacent to riparian  
359 zones may reduce the likelihood of wildfire impacting riparian zones, later in the dry season, when  
360 moisture levels are lower, riparian zones may still become a corridor for fire to travel through (Pettit  
361 and Naiman 2007). Hence, the challenge for land managers and conservationists is to minimise the  
362 impact of fire when it does enter the riparian zone. We propose that this can be achieved on a  
363 landscape scale by using small, low-intensity prescribed burns perpendicularly across the riparian  
364 zone to create breaks along riparian corridors, mitigating the risk of large sections of riparian  
365 corridors burning in the late dry season. It is however important to implement such burns when  
366 conditions are right to prevent escalation to high-intensity fire (i.e. with optimal wind, relatively high  
367 moisture levels), and in years when rainfall has been at or above average.

368 Additionally, fine-scale fire management may be implemented at priority sites to offer maximal  
369 protection for high-quality riparian habitat with high purple-crowned fairy-wren density. Here,  
370 savanna habitat parallel to the riparian zone may be burnt when savanna habitat has cured but  
371 riparian habitat has not yet, followed later by burning small sections of riparian habitat across the

372 waterway once conditions are optimal, thereby creating a complete protective buffer around the  
373 high-quality site. Based on the results of this study, this strategy of implementing low-intensity  
374 prescribed burns is not expected to affect survival of adult fairy-wrens, which appears important for  
375 post-fire population recovery: recovery after a low-intensity fire, with no mortality, was faster,  
376 despite reduced breeding success, than after a high-intensity fire. It is important however to  
377 consider the timing of fire when planning prescribed riparian burns: by burning immediately after  
378 the main breeding season (around April), the effect on reproductive output may be minimised,  
379 impacting breeding success for one season only, the subsequent year post-fire.

380

#### 381 **AUTHOR CONTRIBUTIONS**

382 Niki Teunissen and Anne Peters conceived the study; Niki Teunissen collected and analysed data;  
383 Niki Teunissen led the writing of the manuscript, with input from Hamish McAlpine, Skye Cameron,  
384 Brett Murphy, and Anne Peters. All authors gave final approval for publication.

385

#### 386 **ACKNOWLEDGEMENTS**

387 We acknowledge the traditional custodians of the country on which this research was conducted.  
388 We thank Michael Roast, Marie Fan, Nataly Hidalgo Aranzamendi, and all volunteers who helped  
389 collect data. We thank Australian Wildlife Conservancy and staff at Mornington Wildlife Sanctuary  
390 for their contributions to fire management and ongoing support. This study was supported by the  
391 Australian Research Council (FT110100505; DP150103595, DP180100058 to A.P.) and Monash  
392 University. Research was approved by the Monash University Animal Ethics Committee; the Western  
393 Australian Department of Biodiversity, Conservation and Attractions; the Australian Bird and Bat  
394 Banding Scheme; and the Australian Wildlife Conservancy.

395

#### 396 **CONFLICT OF INTEREST**

397 We have no conflicts of interest to declare.

398

#### 399 **DATA AVAILABILITY STATEMENT**

400 Data will be archived in the Dryad Digital Repository.

401

#### 402 **REFERENCES**

403 Almazroui, M., F. Saeed, S. Saeed, M. Ismail, M. A. Ehsan, M. N. Islam, M. A. Abid, E. O'Brien, S.  
404 Kamil, I. U. Rashid, and I. Nadeem. 2021. Projected changes in climate extremes using CMIP6  
405 simulations over SREX regions. *Earth Systems and Environment* 5:481-497.

- 406 Andersen, A. N. 2021. Faunal responses to fire in Australian tropical savannas: Insights from field  
407 experiments and their lessons for conservation management. *Diversity and Distributions*  
408 **27**:828-843.
- 409 Aranzamendi, N. H., M. L. Hall, S. A. Kingma, M. van de Pol, and A. Peters. 2019. Rapid plastic  
410 breeding response to rain matches peak prey abundance in a tropical savanna bird. *Journal*  
411 *of Animal Ecology* **88**:1799-1811.
- 412 Bowman, D., J. K. Balch, P. Artaxo, W. J. Bond, J. M. Carlson, M. A. Cochrane, C. M. D'Antonio, R. S.  
413 DeFries, J. C. Doyle, S. P. Harrison, F. H. Johnston, J. E. Keeley, M. A. Krawchuk, C. A. Kull, J. B.  
414 Marston, M. A. Moritz, I. C. Prentice, C. I. Roos, A. C. Scott, T. W. Swetnam, G. R. van der  
415 Werf, and S. J. Pyne. 2009. Fire in the Earth system. *Science* **324**:481-484.
- 416 Capon, S. J., L. E. Chambers, R. Mac Nally, R. J. Naiman, P. Davies, N. Marshall, J. Pittock, M. Reid, T.  
417 Capon, M. Douglas, J. Catford, D. S. Baldwin, M. Stewardson, J. Roberts, M. Parsons, and S. E.  
418 Williams. 2013. Riparian ecosystems in the 21st century: hotspots for climate change  
419 adaptation? *Ecosystems* **16**:359-381.
- 420 Conradie, S. R., S. M. Woodborne, B. O. Wolf, A. Pessato, M. M. Mariette, and A. E. McKechnie. 2020.  
421 Avian mortality risk during heat waves will increase greatly in arid Australia during the 21st  
422 century. *Conservation Physiology* **8**:coaa0048.
- 423 Douglas, M. M., S. A. Setterfield, K. McGuinness, and P. S. Lake. 2015. The impact of fire on riparian  
424 vegetation in Australia's tropical savanna. *Freshwater Science* **34**:1351-1365.
- 425 Driscoll, D. A., D. B. Lindenmayer, A. F. Bennett, M. Bode, R. A. Bradstock, G. J. Cary, M. F. Clarke, N.  
426 Dexter, R. Fensham, G. Friend, M. Gill, S. James, G. Kay, D. A. Keith, C. MacGregor, J. Russell-  
427 Smith, D. Salt, J. E. M. Watson, R. J. Williams, and A. York. 2010. Fire management for  
428 biodiversity conservation: Key research questions and our capacity to answer them.  
429 *Biological Conservation* **143**:1928-1939.
- 430 Flores, B. M., M. D. Dechoum, I. B. Schmidt, M. Hirota, A. Abrahao, L. Verona, L. L. F. Pecoral, M. B.  
431 Cure, A. L. Giles, P. D. Costa, M. B. Pamplona, G. G. Mazzochini, P. Groenendijk, G. L. Minski,  
432 G. Wolfsdorf, A. B. Sampaio, F. Piccolo, L. Melo, R. F. de Lima, and R. S. Oliveira. 2021.  
433 Tropical riparian forests in danger from large savanna wildfires. *Journal of Applied Ecology*  
434 **58**:419-430.
- 435 Fremier, A. K., M. Kiparsky, S. Gmur, J. Aycrigg, R. K. Craig, L. K. Svancara, D. D. Goble, B. Cosens, F.  
436 W. Davis, and J. M. Scott. 2015. A riparian conservation network for ecological resilience.  
437 *Biological Conservation* **191**:29-37.
- 438 Gonzalez, T. M., J. D. Gonzalez-Trujillo, A. Munoz, and D. Armenteras. 2022. Effects of fire history on  
439 animal communities: a systematic review. *Ecological Processes* **11**.

- 440 Hale, S., L. Mendoza, T. Yeatman, R. Cooke, T. Doherty, D. Nimmo, and J. G. White. 2022. Evidence  
441 that post-fire recovery of small mammals occurs primarily via in situ survival. *Diversity and*  
442 *Distributions* **28**:404-416.
- 443 Hidalgo Aranzamendi, N., M. L. Hall, S. A. Kingma, P. Sunnucks, and A. Peters. 2016. Incest avoidance,  
444 extrapair paternity, and territory quality drive divorce in a year-round territorial bird.  
445 *Behavioral Ecology* **27**:1808-1819.
- 446 Hradsky, B. A., C. Mildwaters, E. G. Ritchie, F. Christie, and J. Di Stefano. 2017. Responses of invasive  
447 predators and native prey to a prescribed forest fire. *Journal of Mammalogy* **98**:835-847.
- 448 Jolly, C. J., C. R. Dickman, T. S. Doherty, L. M. Eeden, W. L. Geary, S. M. Legge, J. C. Z. Woinarski, and  
449 D. G. Nimmo. 2022. Animal mortality during fire. *Global Change Biology* **28**:2053-2065.
- 450 Kelly, L. T., K. M. Giljohann, A. Duane, N. Aquilue, S. Archibald, E. Batllori, A. F. Bennett, S. T.  
451 Buckland, Q. Canelles, M. F. Clarke, M. J. Fortin, V. Hermoso, S. Herrando, R. E. Keane, F. K.  
452 Lake, M. A. McCarthy, A. Moran-Ordonez, C. L. Parr, J. G. Pausas, T. D. Penman, A. Regos, L.  
453 Rumpff, J. L. Santos, A. L. Smith, A. D. Syphard, M. W. Tingley, and L. Brotons. 2020. Fire and  
454 biodiversity in the Anthropocene. *Science* **370**:eabb0355.
- 455 Kingma, S. A., M. L. Hall, E. Arriero, and A. Peters. 2010. Multiple benefits of cooperative breeding in  
456 purple-crowned fairy-wrens: a consequence of fidelity? *Journal of Animal Ecology* **79**:757-  
457 768.
- 458 Krosby, M., D. M. Theobald, R. Norheim, and B. H. McRae. 2018. Identifying riparian climate  
459 corridors to inform climate adaptation planning. *Plos One* **13**:e0205156.
- 460 Martin, T. E., J. Scott, and C. Menge. 2000. Nest predation increases with parental activity:  
461 separating nest site and parental activity effects. *Proceedings of the Royal Society B-*  
462 *Biological Sciences* **267**:2287-2293.
- 463 McGregor, H., S. Legge, M. E. Jones, and C. N. Johnson. 2015. Feral cats are better killers in open  
464 habitats, revealed by animal-borne video. *Plos One* **10**.
- 465 Bureau of Meteorology, and CSIRO. 2020. State of the Climate. [http://www.bom.gov.au/state-of-](http://www.bom.gov.au/state-of-the-climate/2020/)  
466 [the-climate/2020/](http://www.bom.gov.au/state-of-the-climate/2020/)
- 467 Murphy, S. A., S. M. Legge, J. Heathcote, and E. Mulder. 2010. The effects of early and late-season  
468 fires on mortality, dispersal, physiology and breeding of red-backed fairy-wrens (*Malurus*  
469 *melanocephalus*). *Wildlife Research* **37**:145-155.
- 470 Nimmo, D. G., S. Avitabile, S. C. Banks, R. B. Bird, K. Callister, M. F. Clarke, C. R. Dickman, T. S.  
471 Doherty, D. A. Driscoll, A. C. Greenville, A. Haslem, L. T. Kelly, S. A. Kenny, J. J. Lahoz-  
472 Monfort, C. Lee, S. Leonard, H. Moore, T. M. Newsome, C. L. Parr, E. G. Ritchie, K. Schneider,

- 473 J. M. Turner, S. Watson, M. Westbrooke, M. Wouters, M. White, and A. F. Bennett. 2019.  
474 Animal movements in fire-prone landscapes. *Biological Reviews* **94**:981-998.
- 475 Nimmo, D. G., A. J. R. Carthey, C. J. Jolly, and D. T. Blumstein. 2021. Welcome to the Pyrocene:  
476 Animal survival in the age of megafire. *Global Change Biology* **27**:5684-5693.
- 477 Parr, C. L., and A. N. Andersen. 2006. Patch mosaic burning for biodiversity conservation: a critique  
478 of the pyrodiversity paradigm. *Conservation Biology* **20**:1610-1619.
- 479 Pausas, J. G., and C. L. Parr. 2018. Towards an understanding of the evolutionary role of fire in  
480 animals. *Evolutionary Ecology* **32**:113-125.
- 481 Pettit, N. E., and R. J. Naiman. 2005. Flood-deposited wood debris and its contribution to  
482 heterogeneity and regeneration in a semi-arid riparian landscape. *Oecologia* **145**:434-444.
- 483 Pettit, N. E., and R. J. Naiman. 2007. Fire in the riparian zone: Characteristics and ecological  
484 consequences. *Ecosystems* **10**:673-687.
- 485 Pittman, H. T., and D. G. Kremenetz. 2016. Impacts of short-rotation early-growing season prescribed  
486 fire on a ground nesting bird in the central hardwoods region of North America. *Plos One*  
487 **11**:e0147317.
- 488 R Core Development Team 2022. R: A language and environment for statistical computing. R  
489 Foundation for Statistical Computing, Vienna.
- 490 Roast, M. J., N. H. Aranzamendi, M. Fan, N. Teunissen, M. D. Hall, and A. Peters. 2020. Fitness  
491 outcomes in relation to individual variation in constitutive innate immune function.  
492 *Proceedings of the Royal Society B-Biological Sciences* **287**:20201997.
- 493 Russell-Smith, J., G. D. Cook, P. M. Cooke, A. C. Edwards, M. Lendrum, C. P. Meyer, and P. J.  
494 Whitehead. 2013. Managing fire regimes in north Australian savannas: applying Aboriginal  
495 approaches to contemporary global problems. *Frontiers in Ecology and the Environment*  
496 **11**:E55-E63.
- 497 Russell-Smith, J., P. G. Ryan, and D. C. Cheal. 2002. Fire regimes and the conservation of sandstone  
498 heath in monsoonal northern Australia: frequency, interval, patchiness. *Biological*  
499 *Conservation* **104**:91-106.
- 500 Sharpe, L., B. Cale, and J. L. Gardner. 2019. Weighing the cost: the impact of serial heatwaves on  
501 body mass in a small Australian passerine. *Journal of Avian Biology* **50**.
- 502 Shaw, R. E., A. I. James, K. Tuft, S. Legge, G. J. Cary, R. Peakall, and S. C. Banks. 2021. Unburnt habitat  
503 patches are critical for survival and in situ population recovery in a small mammal after fire.  
504 *Journal of Applied Ecology* **58**:1325-1335.
- 505 Sitters, H., and J. Di Stefano. 2020. Integrating functional connectivity and fire management for  
506 better conservation outcomes. *Conservation Biology* **34**:550-560.

- 507 Skroblin, A., A. Cockburn, and S. Legge. 2014. The population genetics of the western purple-  
508 crowned fairy-wren (*Malurus coronatus coronatus*), a declining riparian passerine. Australian  
509 Journal of Zoology **62**:251-259.
- 510 Skroblin, A., and S. Legge. 2012. Influence of fine-scale habitat requirements and riparian  
511 degradation on the distribution of the purple-crowned fairy-wren (*Malurus coronatus*  
512 *coronatus*) in northern Australia. Austral Ecology **37**:874-884.
- 513 Sommer, N. R., N. M. Moody, S. M. Lantz, M. Leu, J. Karubian, and J. P. Swaddle. 2018. Red-backed  
514 fairywrens adjust habitat use in response to dry season fires. Austral Ecology **43**:876-889.
- 515 Teunissen, N., S. A. Kingma, and A. Peters. 2020. Predator defense is shaped by risk, brood value and  
516 social group benefits in a cooperative breeder. Behavioral Ecology **31**:761-771.
- 517 Tockner, K., and J. A. Stanford. 2002. Riverine flood plains: present state and future trends.  
518 Environmental Conservation **29**:308-330.
- 519 Valentine, L. E., L. Schwarzkopf, and C. N. Johnson. 2012. Effects of a short fire-return interval on  
520 resources and assemblage structure of birds in a tropical savanna. Austral Ecology **37**:23-34.
- 521 Woinarski, J. C. Z., C. Brock, M. Armstrong, C. Hempel, D. Cheal, and K. Brennan. 2000. Bird  
522 distribution in riparian vegetation in the extensive natural landscape of Australia's tropical  
523 savanna: a broad-scale survey and analysis of a distributional data base. Journal of  
524 Biogeography **27**:843-868.
- 525 Woinarski, J. C. Z., and S. Legge. 2013. The impacts of fire on birds in Australia's tropical savannas.  
526 Emu-Austral Ornithology **113**:319-352.
- 527 Wu, C., S. Venevsky, S. Sitch, L. M. Mercado, C. Huntingford, and A. C. Staver. 2021. Historical and  
528 future global burned area with changing climate and human demography. One Earth **4**:517-  
529 530.



530 FIGURES

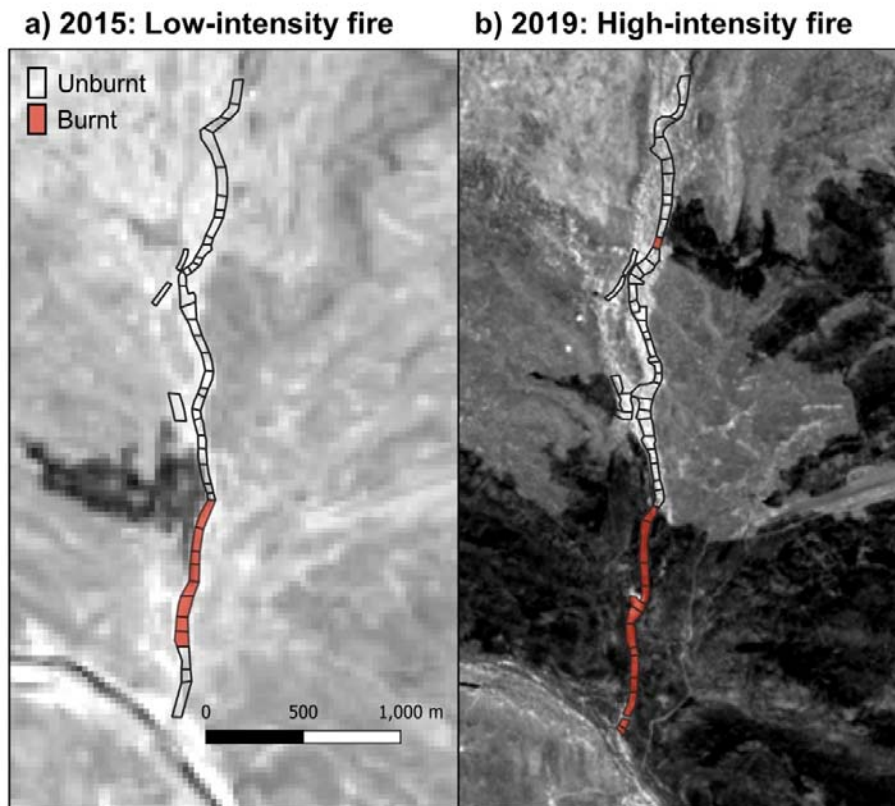

531

532 **Fig. 1.** Satellite images showing burnt areas (in black) along Annie Creek indicating the extent and  
533 intensity of (a) the small, low-intensity fire in 2015, and (b) the extensive, high-intensity fire in 2019.  
534 Polygons depict purple-crowned fairy-wren territories. Polygons highlighted in red were confirmed  
535 burnt by ground-based surveys (note that the southernmost burnt territories in (a) had fire trickle  
536 through the understory of the riparian strip only, therefore not showing up as clearly as a black scar).  
537 One territory further north along the creek was burnt in 2019 (b), but only partly and at lower  
538 intensity, and therefore excluded from analyses. Satellite images were obtained from Sentinel Hub,  
539 from the (a) Landsat 8 satellite (captured on 18 February 2015), and (b) Sentinel-2 satellite (captured  
540 on 19 March 2019).

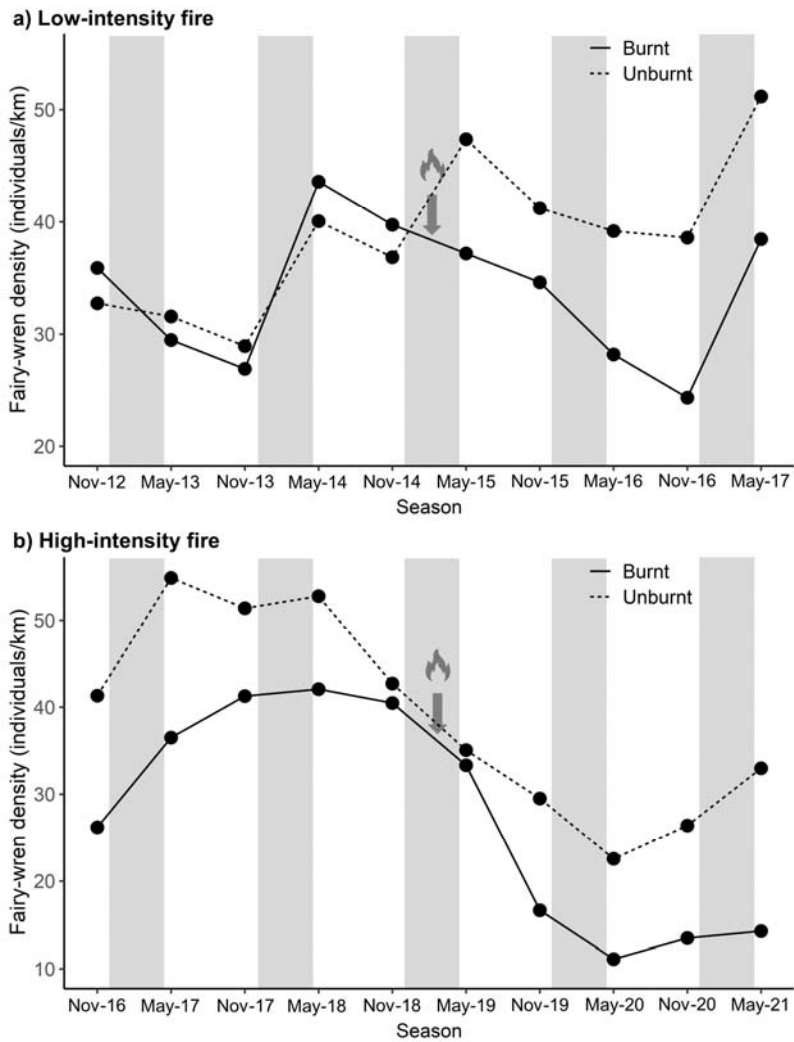

541

542 **Fig. 2.** Population density (individuals/km) in burnt (solid line) and unburnt (dashed line) sections of  
543 the creek following (a) a low-intensity fire, and (b) a high-intensity fire. Arrows indicate timing of fire.

544 Grey shading indicates timing of wet seasons.

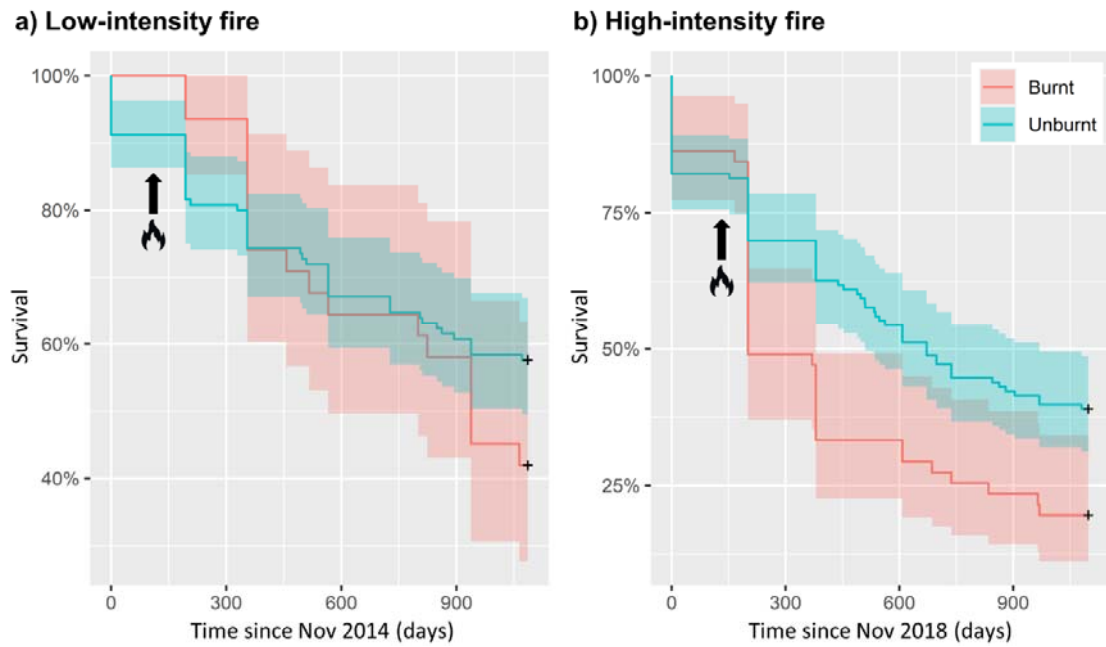

545

546 **Fig. 3.** Purple-crowned fairy-wren adult survival was (a) unaffected by a low-intensity fire, but (b)  
547 reduced following a high-intensity fire, with survival curves for burnt (red) and unburnt areas (blue)  
548 diverging 2 months after fire. Arrows indicate timing of fire. Survival is represented in Kaplan Meier  
549 plots. Shaded bands represent 95% CI.

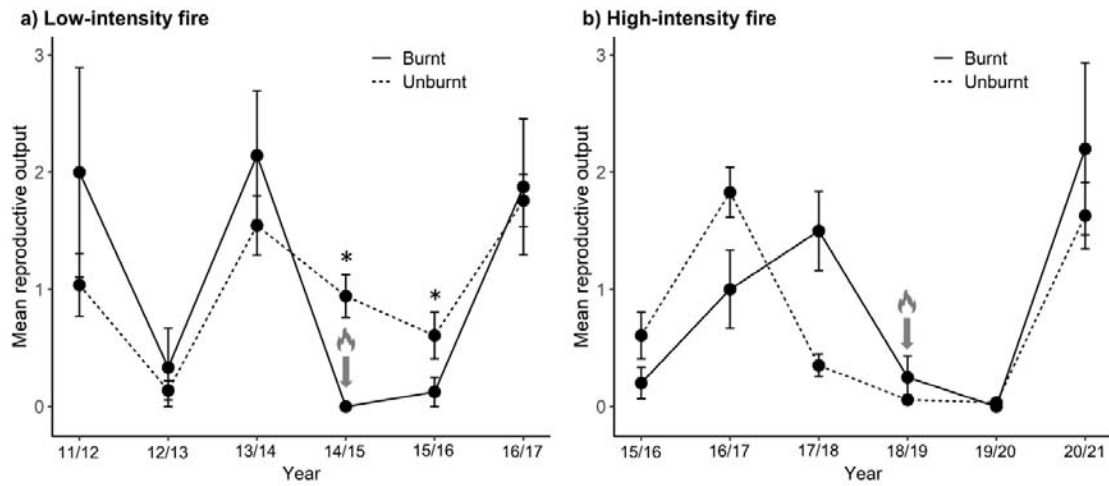

550

551 **Fig. 4.** Mean reproductive output (number of juveniles produced per territory) in burnt (solid line)  
552 and unburnt (dashed line) sections of the creek following (a) a low-intensity fire, and (b) a high-  
553 intensity fire. Error bars represent standard errors. Arrows indicate timing of fire.
